# Supplementary material for: Small extracellular vesicle-loaded bevacizumab reduces the frequency of intravitreal injection required for diabetic retinopathy
Source: PubMed Central journal article supplement (PMC10157735; doi:10.7150/thno.78426), 2023-04-09
Supplement: thnov13p2241s1.pdf [file thnov13p2241s1.pdf]

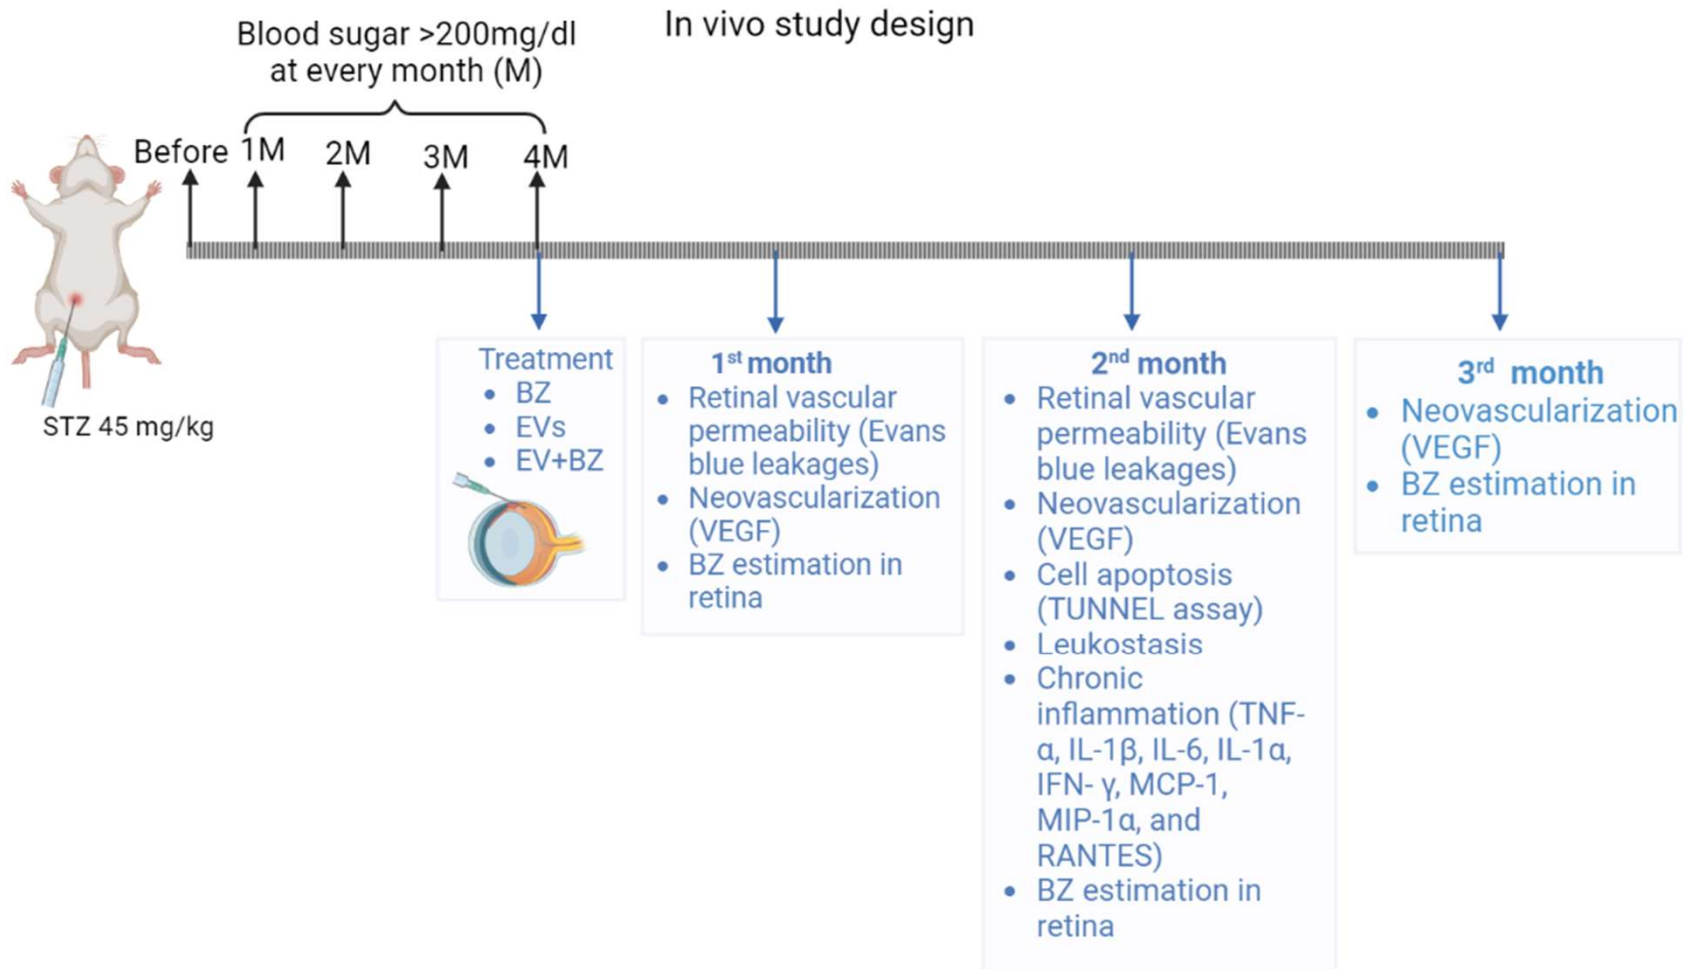

**Figure S1: Study design for the in vivo experiments in Wistar rats**

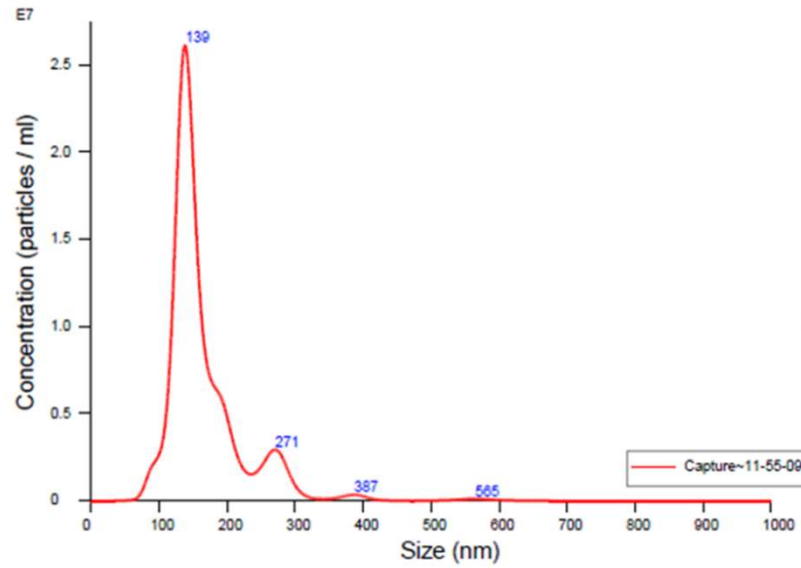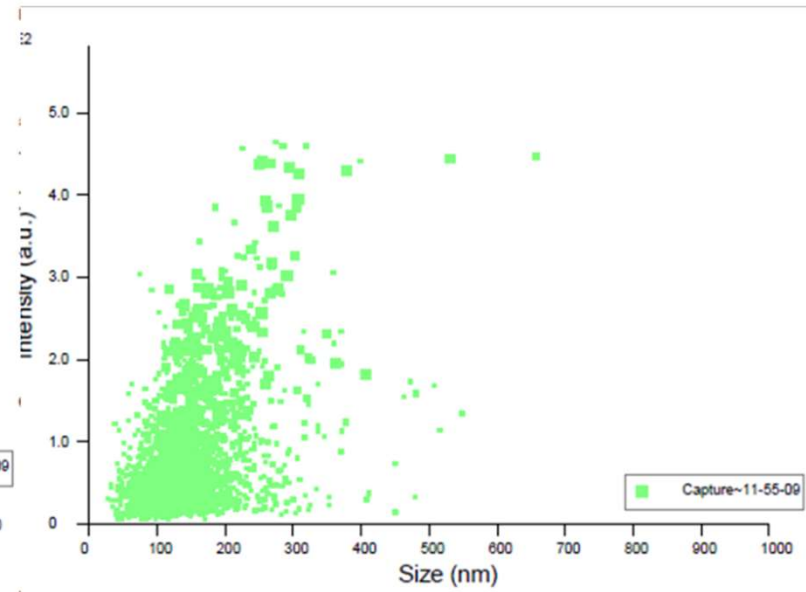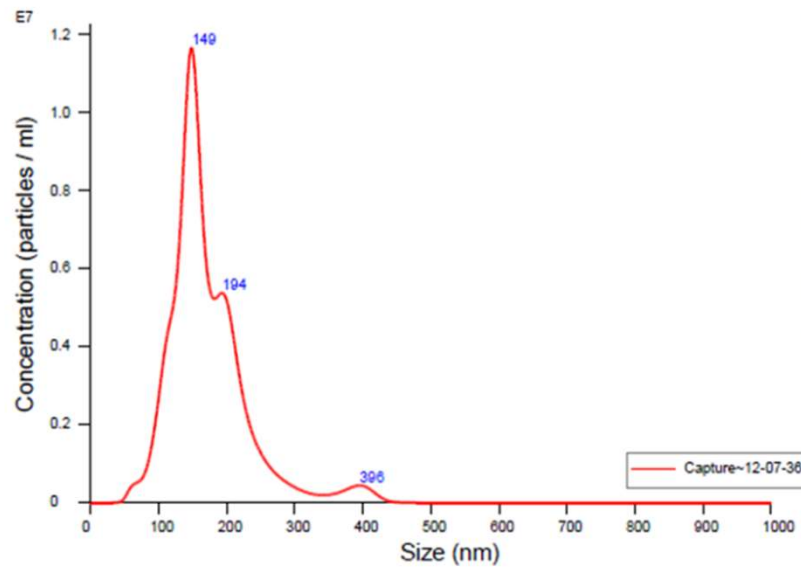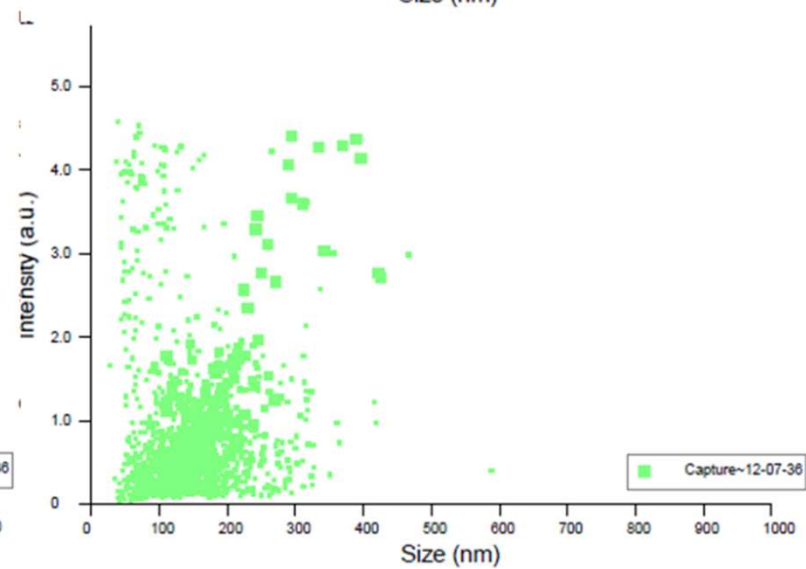

**Figure S2: Isolated EVs are mostly small extracellular vesicles**

Isolation of extracellular vesicles from hMSCs using the polyethylene glycol precipitation method yielded small extracellular vesicles reproducibly. Two additional experimental data (upper panel and lower panel) were provided with NanoSight analysis for size distribution with respective intensity in arbitrary units.

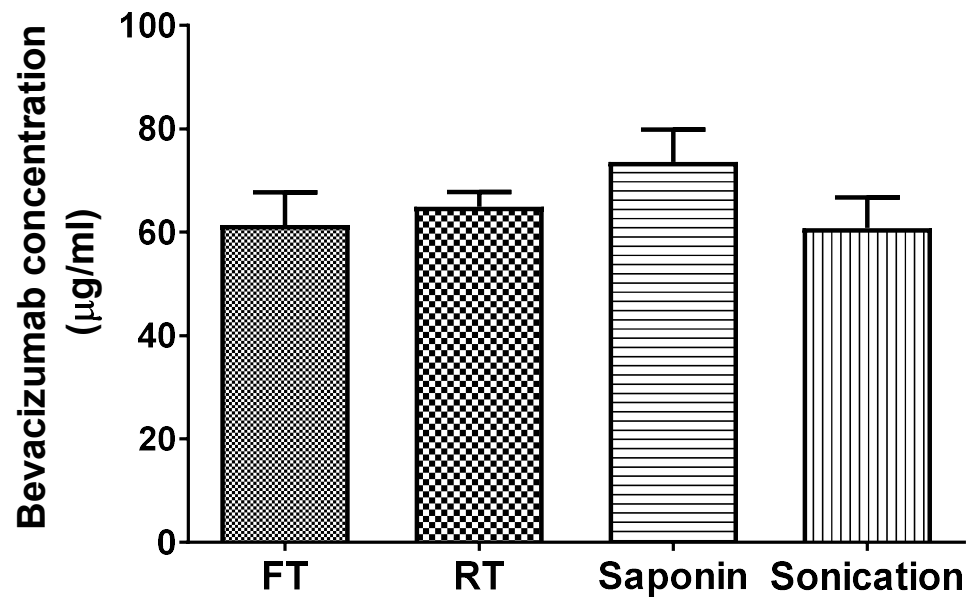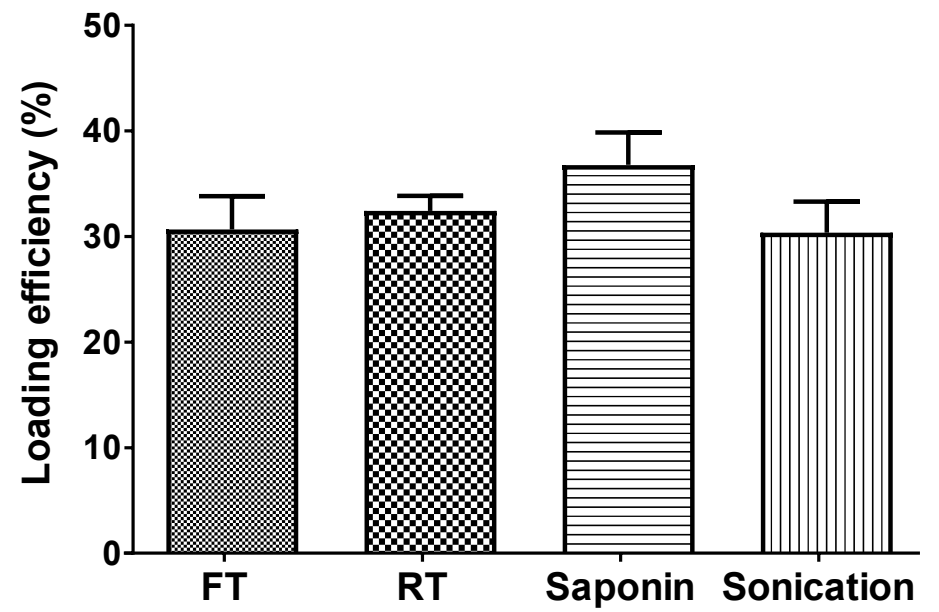

**Figure S3:** Bevacizumab loading into EVs by multiple methods

Small extracellular vesicles were loaded with bevacizumab (BZ) using different methods such as freeze thaw method, co-incubation method, incubation with 0.2% saponin and sonication.

A

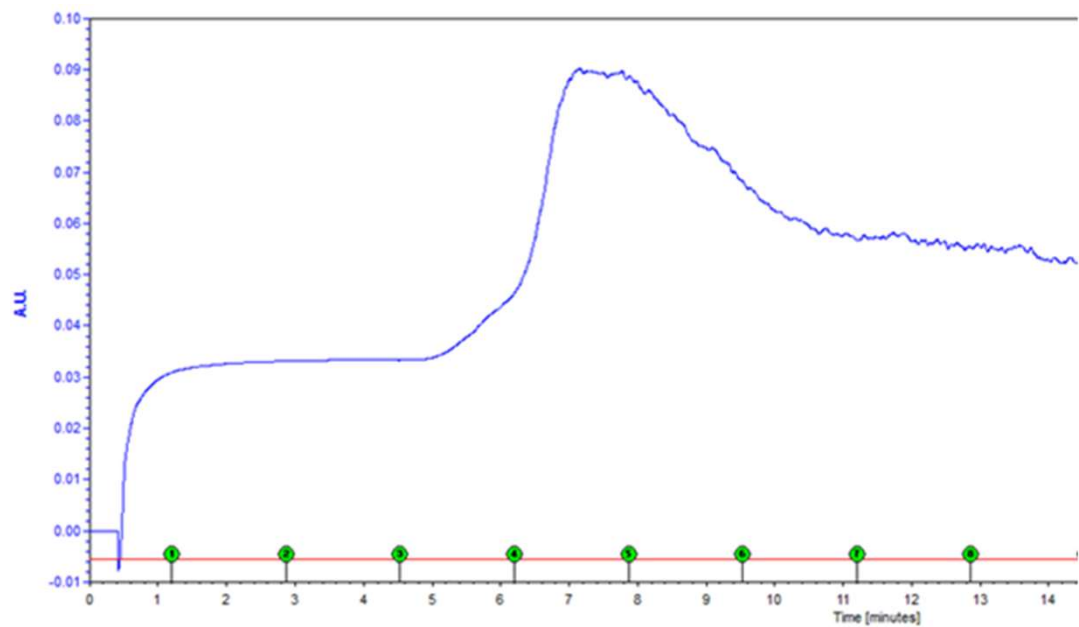

B

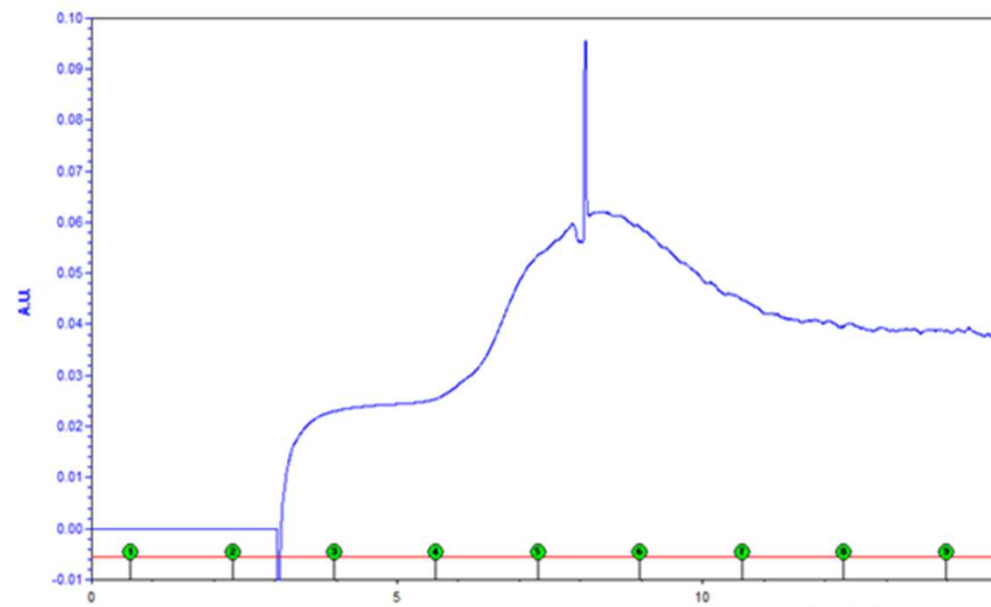

**Figure S4:** Conjugation of bevacizumab with FITC

A. Peak observed in figure A demonstrates bevacizumab alone. Purification of bevacizumab following derivatization started 5 min after sample injecting into column. B. Bevacizumab conjugated to FITC. Pure FITC conjugated bevacizumab started at 7 min of injecting into column.



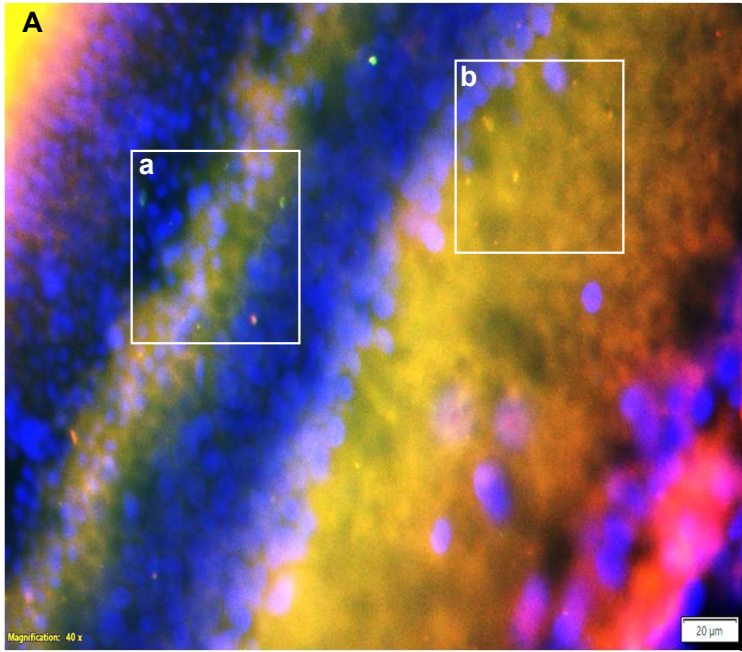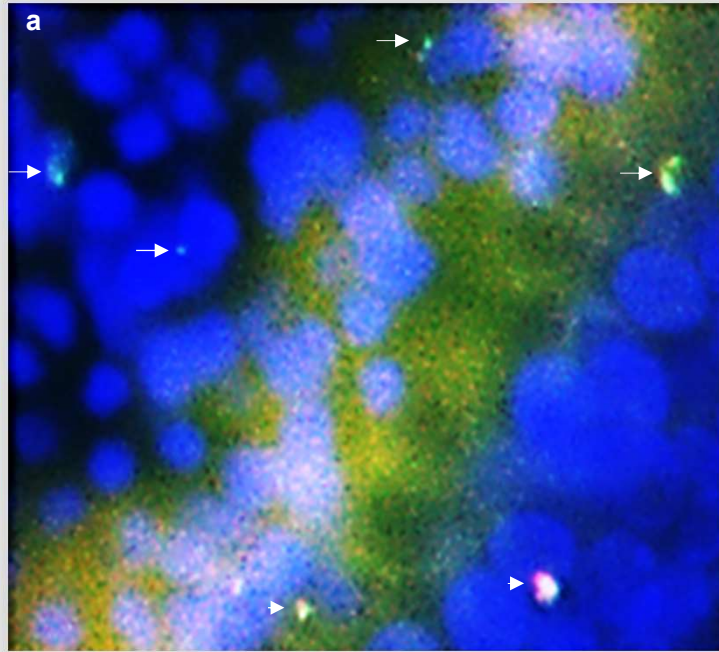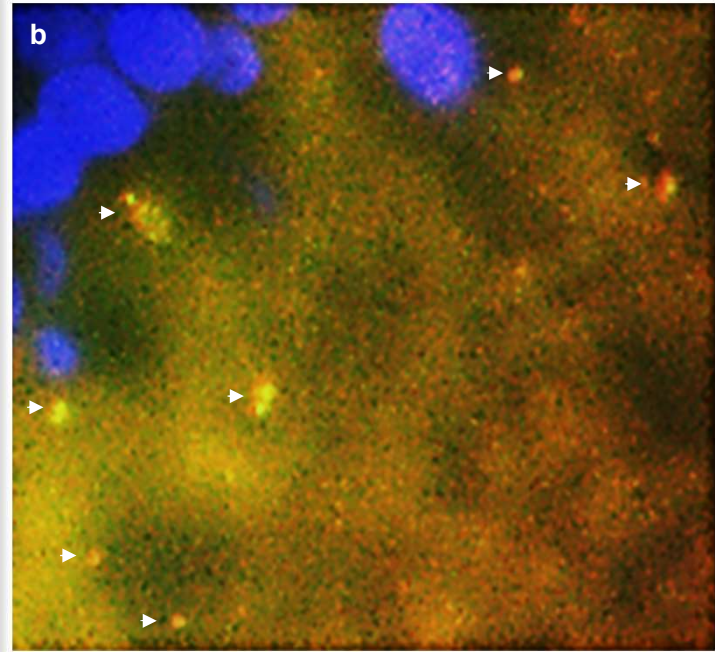

**Figure S5: Demonstration of free BZ and EV-BZ in the retina**

Bevacizumab was conjugated with FITC (green) and sEVs were labelled with PKH 26 (red) before loading BZ into sEVs. At 24 h following intravitreal injection, free BZ (FITC conjugated, green) and sEV loaded with BZ (orange) could be seen in retinal layers in the extracellular matrix, suggesting BZ release from the EVs in the retina. Figure A demonstrates part of a retinal section while a and b demonstrate selected fields from A. Arrows indicate FITC conjugated BZ, and arrowheads indicate sEV loaded with BZ.

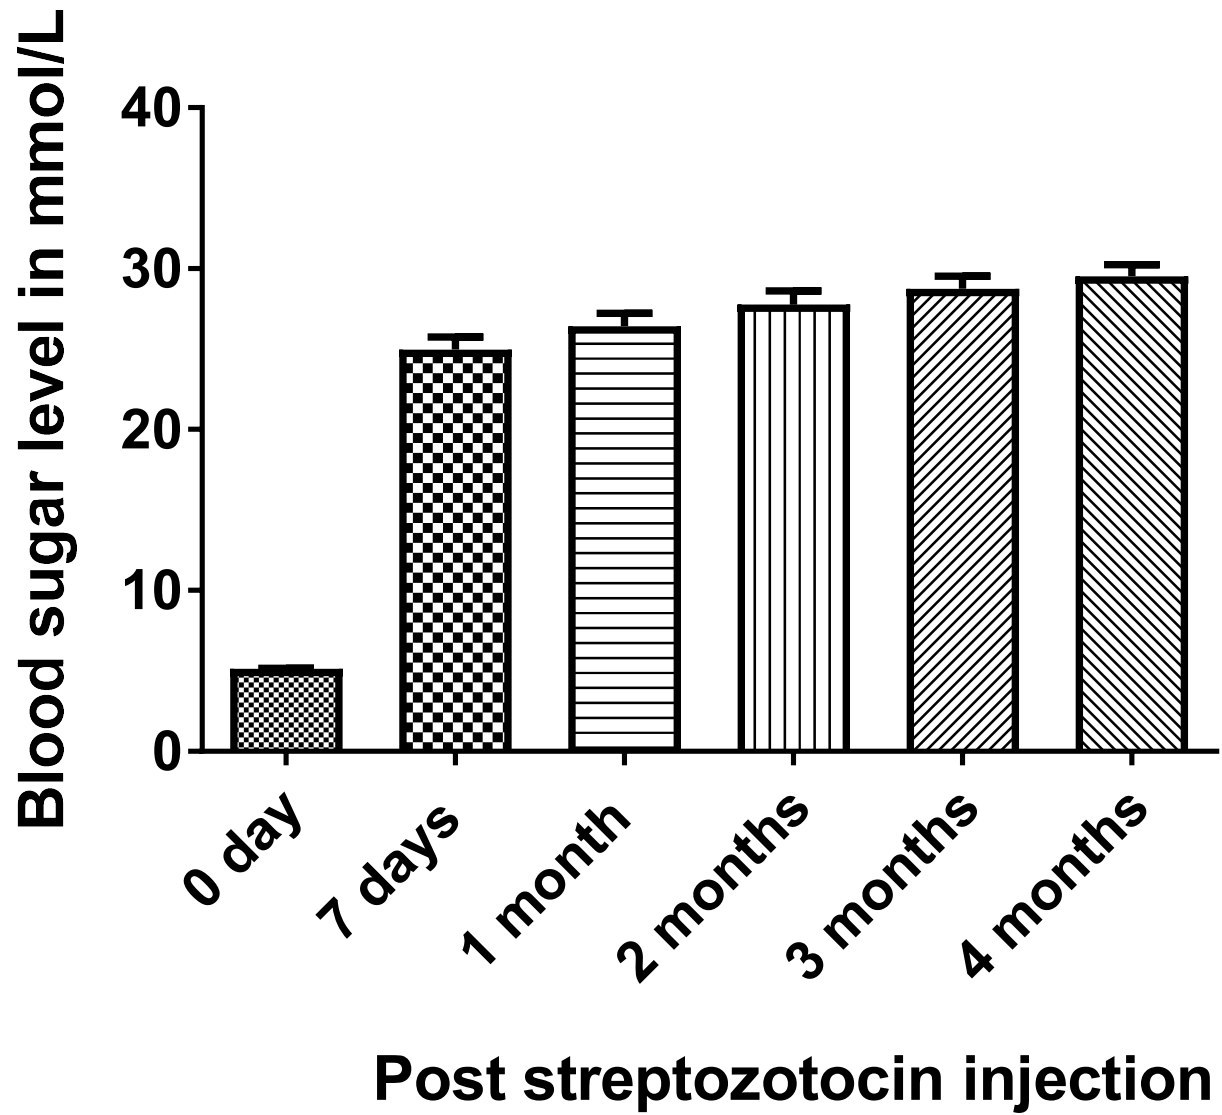

**Figure S6: Blood glucose levels of streptozotocin injected rats**

Following streptozotocin administration, blood glucose levels were continuously monitored in rats (n = 172). Among them, 163 rats-maintained glucose levels consistently >25 mmol/L. Nine rats were excluded due to low blood glucose levels.
